# Supplementary material for: Quantitative Assessment the Longitudinal Changes of Pulmonary Vascular Counts in Chronic Obstructive Pulmonary Disease
Source: Research Square preprint supplement (doi:10.21203/rs.3.rs-861379/v1), 2021-09-07
Supplement: Supplementary file 1 [file 1e092e27d1c648b73222c35e.docx]

Supplement table 1. The GOLD results reflecting the longitudinal changes of pulmonary vascular up to 6 years.

|  | **GOLD1(n=147)** | **GOLD2(n=118)** | **GOLD3(n=23)** | **p-value** |
| --- | --- | --- | --- | --- |

| **3 yr f/u** |
| --- |

| **Ntotal/LSA** | 1.10±0.27 | 1.11±0.26 | 0.82±0.26 | 0.0023 |
| --- | --- | --- | --- | --- |

| **N<5mm/LSA** | 0.96±0.22 | 0.97±0.20 | 0.72±0.21 | 0.0010 |
| --- | --- | --- | --- | --- |

| **6 yr f/u** |
| --- |

| **Ntotal/LSA** | 1.06±0.17 | 1.08±0.22 | 0.70±0.18 | 0.0023 |
| --- | --- | --- | --- | --- |

| **N<5mm/LSA** | 0.92±0.14 | 0.95±0.19 | 0.62±0.17 | 0.0010 |
| --- | --- | --- | --- | --- |

Abbreviations: GOLD; Global Initiative for Chronic Obstructive Lung Disease, Ntotal; Total number of vessels, N<5 mm; Total number of vessels with vessel area less than 5 mm2, LSA; Lung surface area at 6 mm from the pleural surface.

Supplement table 2. The CT-based results reflecting the longitudinal changes of pulmonary vascular up to 6 years.

|  | **no(n=24)** | **SAD(n=46)** | **mild(n=44)** | **moderate(n=14)** | **severe(n=19)** | **p-value** |
| --- | --- | --- | --- | --- | --- | --- |

| **3 yr f/u** | | | | | | |
| --- | --- | --- | --- | --- | --- | --- |
| **Nttotal/LSA** | 1.27±0.31 | 1.20±0.21 | 1.06±0.18 | 0.89±0.15 | 0.73±0.20 | <.0001 |
| **N<5mm /LSA** | 1.08±0.26 | 1.04±0.16 | 0.94±0.15 | 0.80±012 | 0.65±0.18 | <.0001 |
| **6 yr f/u** | | | | | | |
| **Ntotal/LSA** | 1.15±0.17 | 1.11±0.17 | 1.03±018 | 1.02±0.21 | 0.72±0.23 | <.0001 |
| **N<5mm /LSA** | 0.99±0.15 | 0.97±0.15 | 0.92±0.14 | 0.89±0.18 | 0.63±0.19 | <.0001 |

Abbreviations: Ntotal; Total number of vessels, N<5 mm; Total number of vessels with vessel area less than 5 mm2, LSA; Lung surface area at 6 mm from the pleural surface; SAD; Small airway disease. LSA.
